# Supplementary material for: Development and Implementation of a Mobile Application for Choosing Empirical Antimicrobial Therapy for Bacteremia, Pneumonia, Urinary Tract Infection, and Skin and Soft Tissue Infection among Hospitalized Patients
Source: MDPI journal article supplement (doi:10.3390/antibiotics12010113), 2023-01-07
Supplement: s1 [file s1]

**Supplementary Table S1.** Suggested Empiric Antibiotics for Suspected Common Infections in Hospitalized Adult Patients at Siriraj Hospital

| Infection syndrome                                | Risk                          | Suggested Empiric Antibiotic                                | Note                                                                                                                                                                                                                                                                   |
|---------------------------------------------------|-------------------------------|-------------------------------------------------------------|------------------------------------------------------------------------------------------------------------------------------------------------------------------------------------------------------------------------------------------------------------------------|
| Sepsis without identified source of infections    | CAI, no MDR risk <sup>1</sup> | Ceftriaxone                                                 | Add doxycycline or azithromycin if suspected rickettsial infections <sup>2</sup>                                                                                                                                                                                       |
|                                                   | CAI, MDR risk <sup>1</sup>    | IV Co-amoxiclav or Piperacillin/tazobactam                  | Add doxycycline or azithromycin if suspected rickettsial infections <sup>2</sup>                                                                                                                                                                                       |
|                                                   | HAI                           | Meropenem                                                   | Add vancomycin if suspected IV catheter-related infection or evidence of previous MRSA colonization/infection                                                                                                                                                          |
|                                                   | HAI, breakthrough carbapenem  | Colistin                                                    | Add vancomycin if suspected IV catheter-related infection or evidence of previous MRSA colonization/infection                                                                                                                                                          |
| Soft tissue and skin structure infections (SSSIs) | CAI, no MDR risk <sup>1</sup> | IV Cloxacillin or Cefazolin                                 | IV-to-PO switch to dicloxacillin or cephalexin after having clinical improvement and having no contraindication of oral antibiotic                                                                                                                                     |
|                                                   | CAI, MDR risk <sup>1</sup>    | Ceftriaxone or IV co-amoxiclav                              | IV-to-PO switch to co-amoxiclav after having clinical improvement and having no contraindication of oral antibiotic                                                                                                                                                    |
|                                                   | CAI, animal bite              | IV Co-amoxiclav                                             | IV-to-PO switch to co-amoxiclav after having clinical improvement and having no contraindication of oral antibiotic                                                                                                                                                    |
|                                                   | HAI                           | Piperacillin/tazobactam                                     | Add vancomycin if suspected MRSA infection <sup>3</sup>                                                                                                                                                                                                                |
|                                                   |                               | Ceftazidime and clindamycin                                 | Replace clindamycin with vancomycin if suspected MRSA infection <sup>3</sup>                                                                                                                                                                                           |
| Pneumonia                                         | HAI, breakthrough carbapenem  | Colistin and vancomycin                                     |                                                                                                                                                                                                                                                                        |
|                                                   | CAI, no MDR risk <sup>1</sup> | Ceftriaxone and azithromycin                                | Replace ceftriaxone with co-amoxiclav if suspected aspiration pneumonia<br>Replace ceftriaxone with ceftazidime if having risk of <i>Burkholderia pseudomallei</i> infections<br>Add oseltamivir if having recent Flu symptoms or history of close contact to Flu case |
|                                                   | CAI, MDR risk <sup>1</sup>    | Ceftriaxone and azithromycin<br>Or levofloxacin monotherapy | Replace ceftriaxone with ceftazidime if having risk of <i>Burkholderia pseudomallei</i> infections<br>Add oseltamivir if having recent Flu symptoms or history of close contact to Flu case                                                                            |
|                                                   | HAI                           | Piperacillin/tazobactam                                     | Add vancomycin if suspected MRSA infection <sup>3</sup>                                                                                                                                                                                                                |
|                                                   |                               | Meropenem                                                   | Add vancomycin if suspected MRSA infection <sup>3</sup>                                                                                                                                                                                                                |
| Upper UTIs                                        | HAI, breakthrough carbapenem  | Colistin                                                    | Add vancomycin if suspected MRSA infection <sup>3</sup><br>Add clindamycin if suspected aspiration pneumonia <sup>4</sup>                                                                                                                                              |
|                                                   | CAI, no MDR risk <sup>1</sup> | Ceftriaxone                                                 | Gentamicin if having normal renal function                                                                                                                                                                                                                             |
|                                                   | CAI, MDR risk <sup>1</sup>    | Amikacin                                                    | If having normal renal function                                                                                                                                                                                                                                        |
|                                                   |                               | IV Co-amoxiclav                                             | If having impaired renal function                                                                                                                                                                                                                                      |
|                                                   |                               | Ertapenem                                                   | If previous colonization or infection with ESBL-producing GNB in the past 3 months and having impaired renal function                                                                                                                                                  |
|                                                   | HAI                           | Meropenem                                                   |                                                                                                                                                                                                                                                                        |
|                                                   | HAI, breakthrough carbapenem  | Colistin                                                    | Add vancomycin if suspected MRSA infection <sup>3</sup> or <i>E. faecium</i> infection                                                                                                                                                                                 |

### **Abbreviation**

**CAIs, community-acquired infections** – the onset of symptoms occurs before hospitalization/within 48 hours after hospitalization and no healthcare associated conditions i.e. chronic hemodialysis, indwelling urinary catheter

**HAIs, hospital-acquired infections** – the onset of symptoms occurs >48 hours after hospitalization or with healthcare associated conditions i.e. chronic hemodialysis, indwelling urinary catheter

**SSSIs**, Soft tissue and skin infections – including cellulitis, erysipelas, abscess, surgical site infections, etc.

**MDR** = Multi-Drug Resistant

**MRSA** = Methicillin-Resistant *Staphylococcus aureus*

### **Footnote:**

1. **MDR risks** - previous antibiotic therapy or previous MDR bacteria colonization/infection within the past 3 months
2. **Suspected rickettsial infection** – i.e. undifferentiated fever, generalized lymphadenopathy, eschar, history of chigger or tick bite
3. **Suspected MRSA infection** - having evidence of MRSA colonization or gram-staining of clinical specimen shows gram-positive cocci in clusters while receiving beta-lactam therapy
4. **Suspected aspiration pneumonia** – having history of aspiration or having risk of aspiration (i.e. presence of nasogastric tube)
